# Supplementary material
Source: PubMed Central journal article supplement (PMC3628112)
Supplement: supp_blood-2011-12-395772_blood-2011-12-395772-1.pdf [file supp_blood-2011-12-395772_blood-2011-12-395772-1.pdf]

## Supplemental Figure legends

**Supplemental Figure 1.** (A) The breeding strategy used to obtain the EC-Smad2/3KO mice is shown. The Smad2<sup>fl/fl</sup>;Smad3<sup>+/-</sup>;Tie2-Cre mice were used as control mice in all experiments if there are no descriptions. (B) Gross morphology of Smad2<sup>fl/fl</sup>;Smad3<sup>+/-</sup>;Tie2-Cre (left panel) and EC-Smad2/3KO embryos (right panel) at E13.5.

**Supplemental Figure 2.** Gross morphology of EC-ALK5KO (left panel) at E12.5 and EC-Smad4KO embryos (right panel) at E9.5.

**Supplemental Figure 3.** Whole-mount LacZ-stained Rosa26 transgenic embryos without (left panel) or with Tie2-Cre transgene (right panel) at E11.5. The right photo in the right panel shows high magnification of the left photo in the right panel.

**Supplemental Figure 4.** Expression of PDGF-B (A), CNN1 (B) and S1PR family (C and D) in S2<sup>fl/fl</sup> and S2/3KO MEECs. Total RNAs from each sample were used to generate 1<sup>st</sup>-strand cDNAs. Primer sets for PCR are described in Supplemental Table 3. CNN1 (calponin 1) is known to be induced by S1P (Donati et al., PLoS ONE, 6: e20389, 2011). MEECs were stimulated with either 1 mM S1P or 5 ng/ml TGF- $\beta$  for 24 h. CNN1 is induced in S2/3KO MEECs upon S1P stimulation although S1P marginally

induced CNN1 mRNA in S2<sup>fl/fl</sup> MEECs.

**Supplemental Figure 5.** Statistical analysis for the length of tight junction between ECs. The length of tight junction was measured using Image-J (NIH). All values are expressed as mean  $\pm$  SD. Comparisons were performed by 1-way ANOVA followed by Bonferroni's post hoc test. Statistics were performed using Statview-J 5.0 (SAS Institute) and differences were considered statistically significant as \* $p < 0.05$ .

**Supplemental Figure 6.** Statistical analysis for vascular sprouting from OMDs. The length of vascular sprouting was measured using Image-J (NIH). All values are expressed as mean  $\pm$  SD. Comparisons were performed by 1-way ANOVA followed by Bonferroni's post hoc test. Statistics were performed using Statview-J 5.0 (SAS Institute) and differences were considered statistically significant as \* $p < 0.05$ .

**Supplemental Figure 7.** Decreased expression of VE-cadherin in aorta from EC-Smad2/3KO embryos. Transverse sections of aorta from E11.5 embryos were stained with anti-VE-cadherin (green) and anti-PECAM-1 (red) antibodies. (A) Smad2<sup>fl/fl</sup>;Smad3<sup>+/-</sup>;Tie2-Cre (B) EC-Smad2/3KO embryos.

(A)

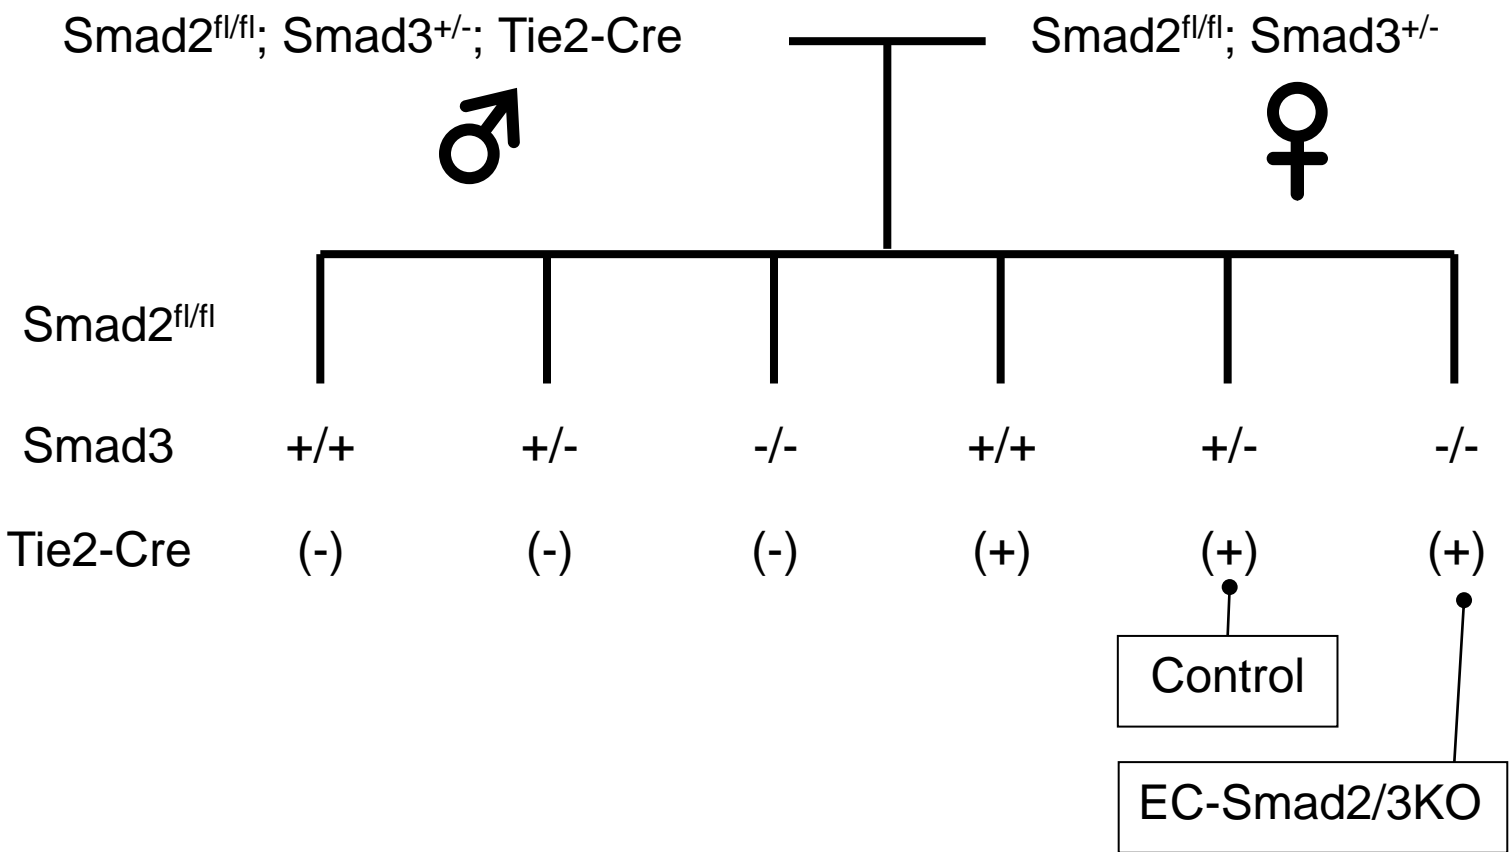

B

Smad2<sup>fl/fl</sup>;Smad3<sup>+/-</sup>;Tie2-Cre

EC-Smad2/3KO

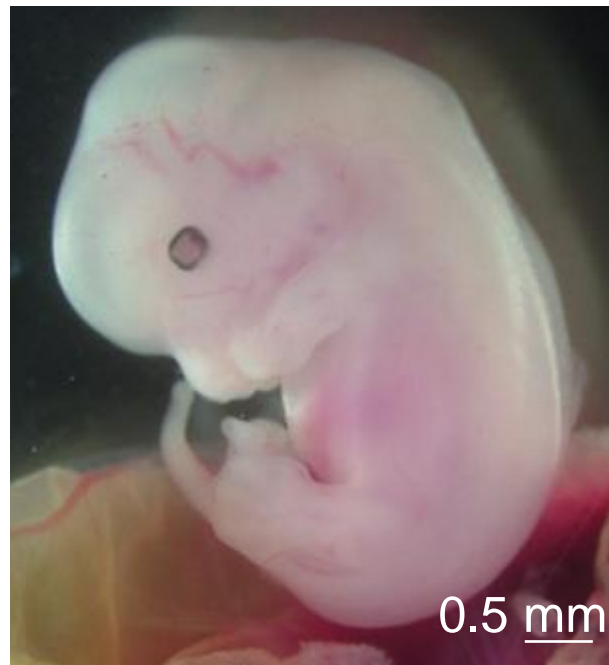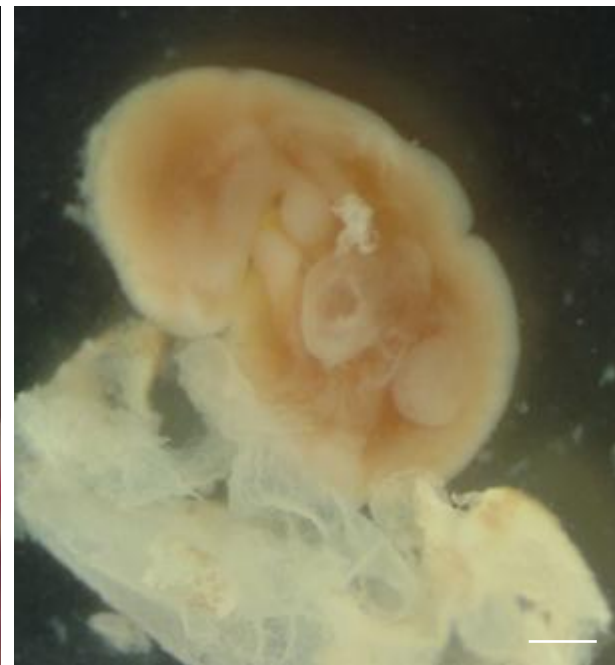

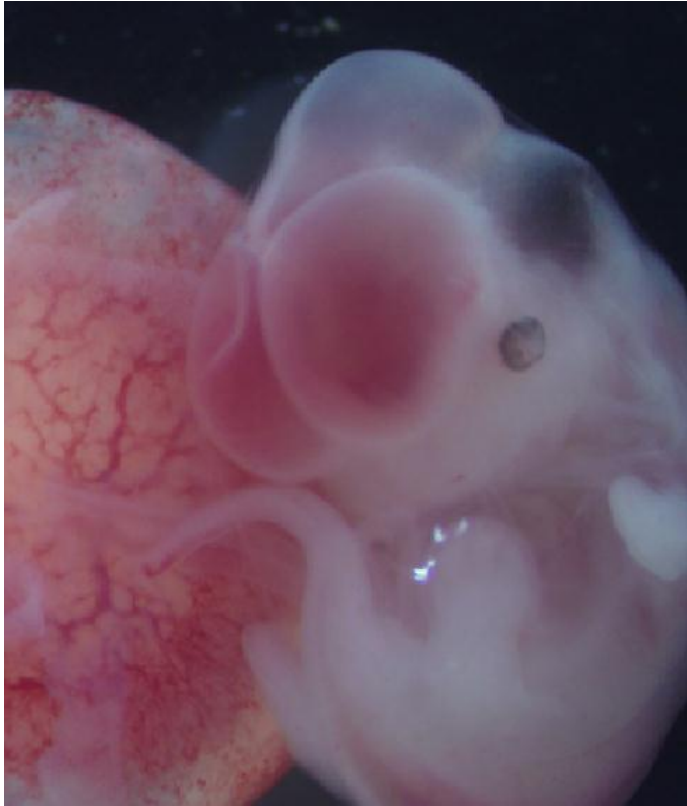

EC-ALK5KO

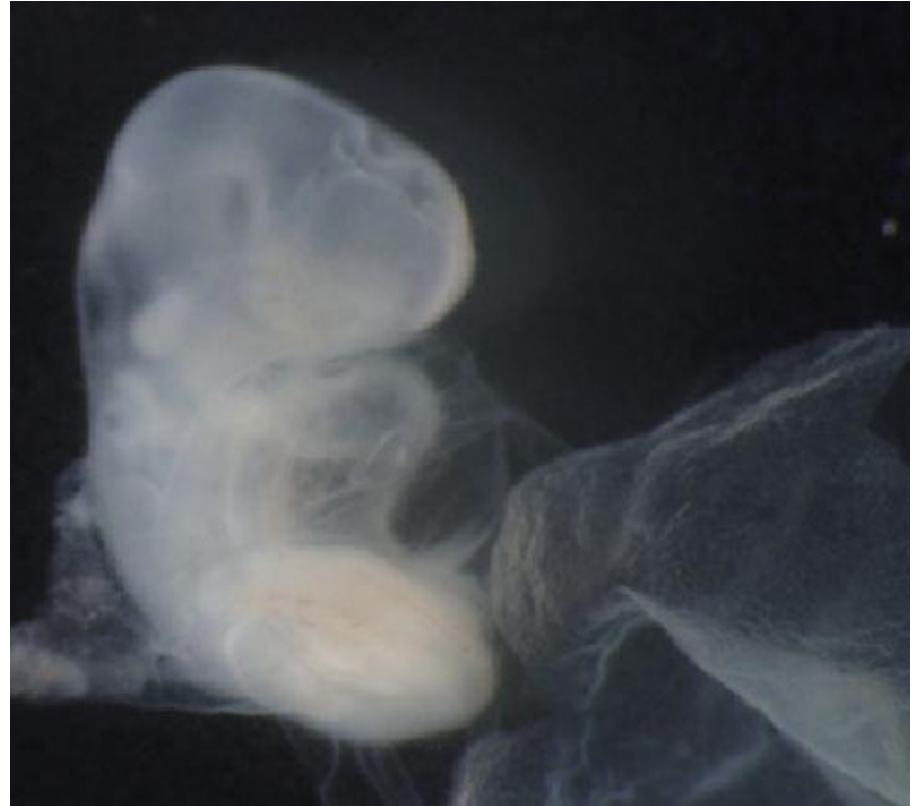

EC-Smad4KO

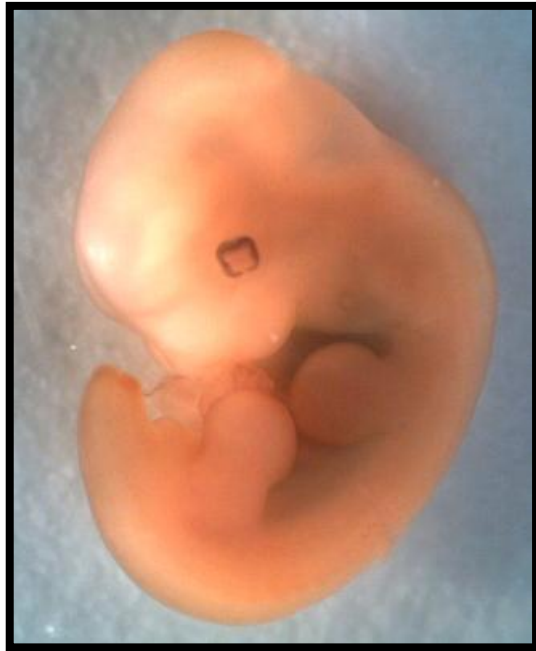

Tie2-Cre

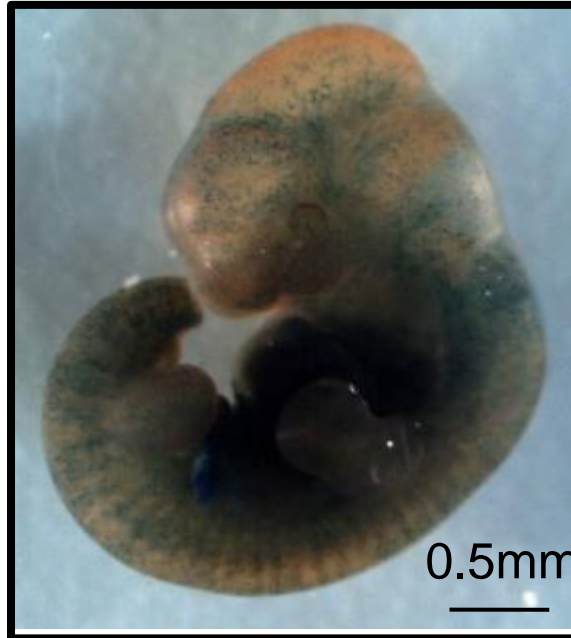

Tie2-Cre;Rosa26

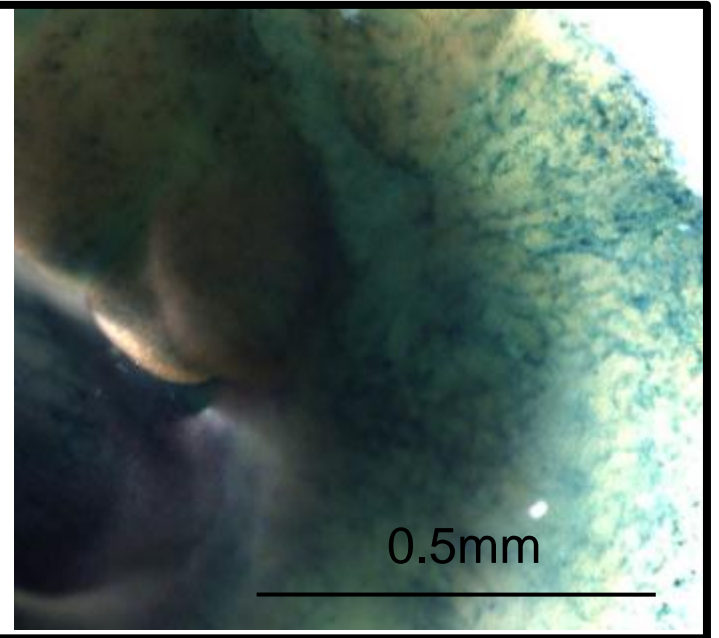

Supplemental Figure 4 (Itoh F et al)

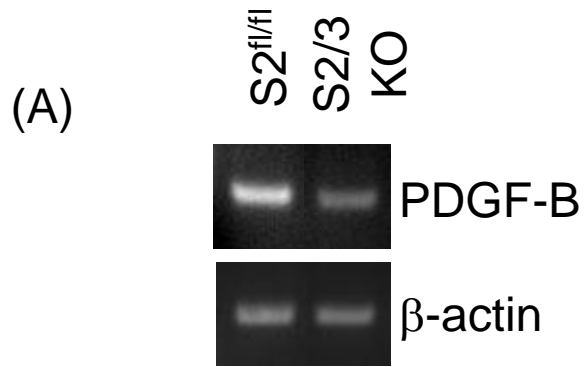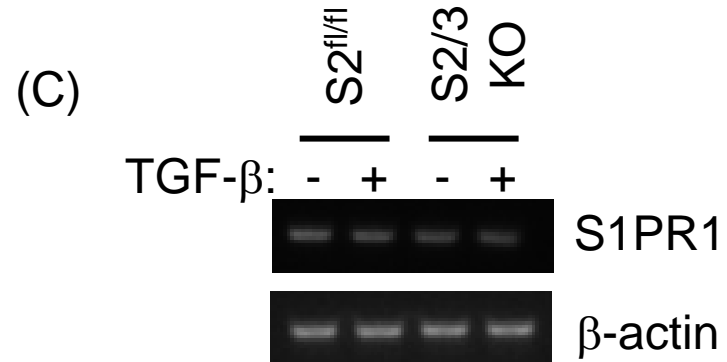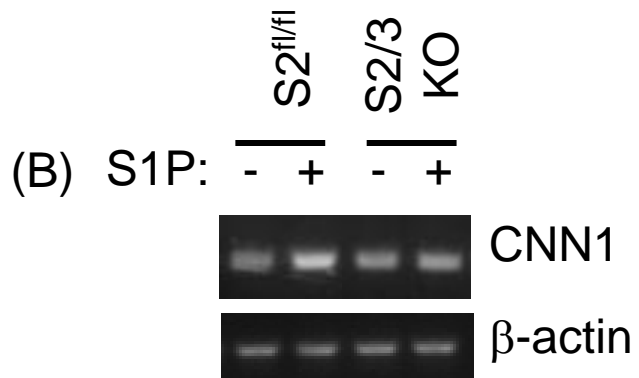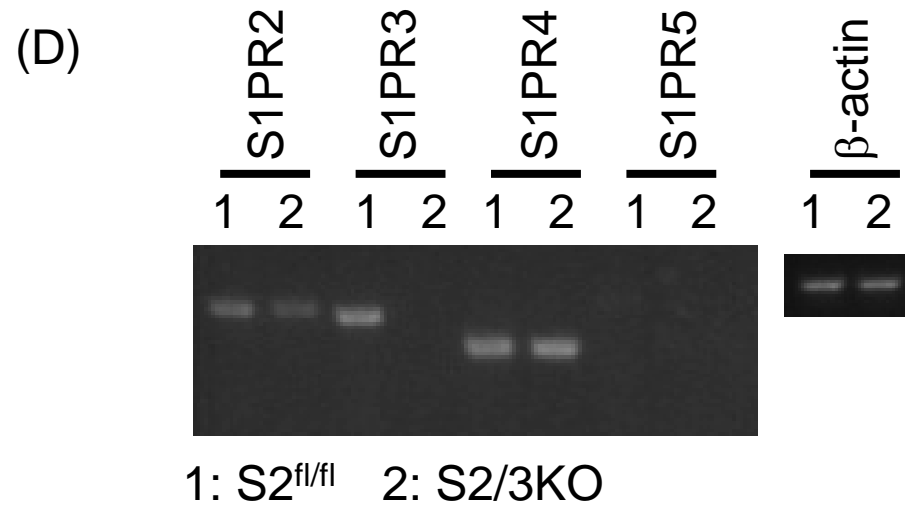

Supplemental Figure 5 (Itoh F et al)

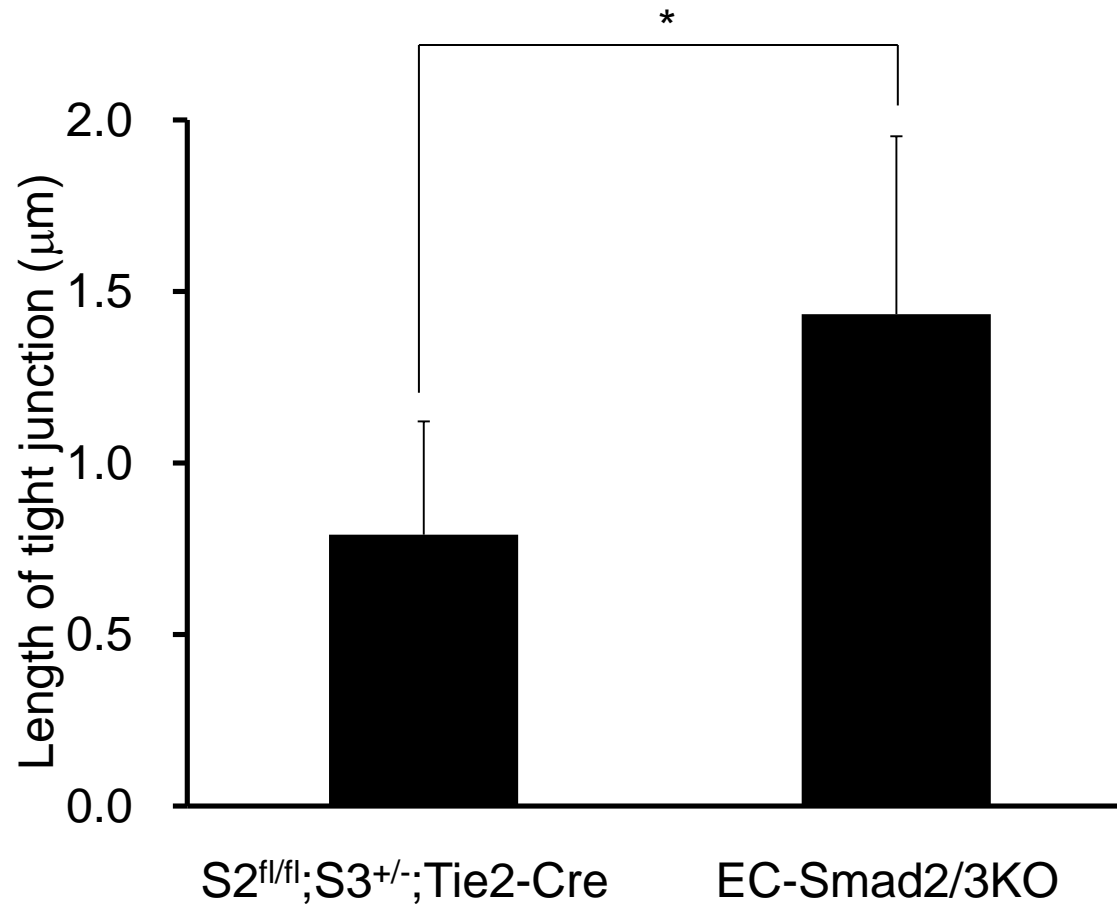



Supplemental Figure 6 (Itoh F et al)

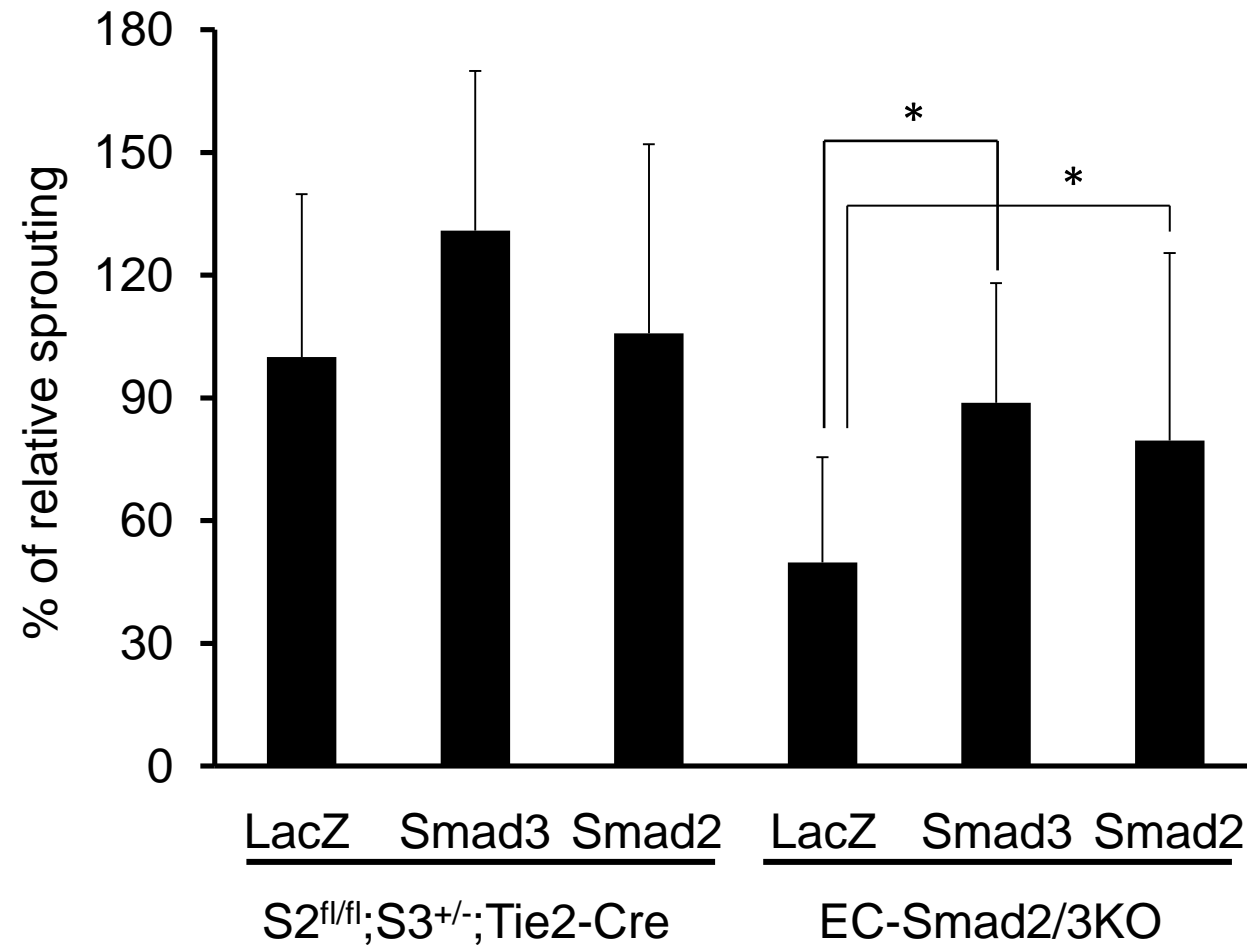

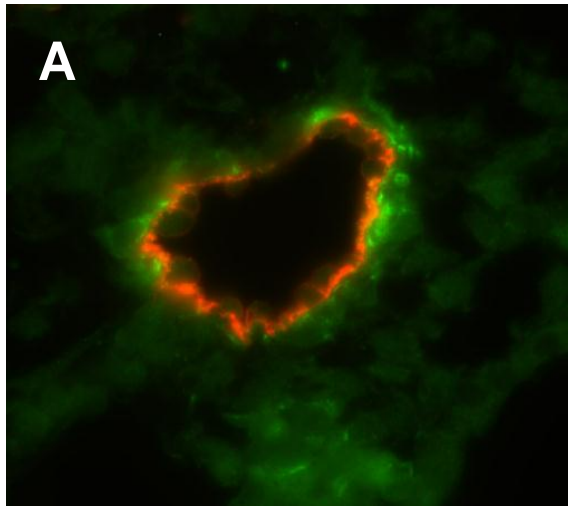

Smad2<sup>fl/fl</sup>;Smad3<sup>+/-</sup>;Tie2-Cre

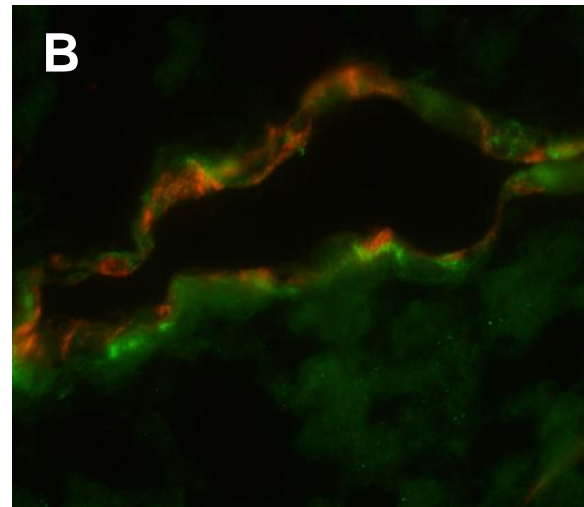

EC-Smad2/3KO

## Supplemental Table 1

Number of embryos obtained from crosses between  $Smad2^{fl/fl};Smad3^{+/-};Tie2-Cre$  and  $Smad2^{fl/fl};Smad3^{+/-}$  mice

|            | Smad2 <sup>flox/flox</sup> |            |            |             |             |          | Absorbed | Total |
|------------|----------------------------|------------|------------|-------------|-------------|----------|----------|-------|
|            | Smad3: +/+                 | Smad3: +/- | Smad3: -/- | control +/+ | control +/- | CDKO -/- |          |       |
| Tie2-Cre:  | -                          | -          | -          | +           | +           | +        |          |       |
| E 10.5     | 47                         | 95         | 46         | 59          | 98          | 48       | 0        | 393   |
| E 11.5     | 36                         | 48         | 25         | 34          | 57          | 26       | 0        | 226   |
| E 12.5     | 13                         | 23         | 6          | 15          | 20          | 3        | 0        | 80    |
| E 13.5     | 12                         | 21         | 9          | 14          | 20          | 0        | 4        | 80    |
| Post Natal | 55                         | 104        | 36         | 36          | 29          | 0        | -        | 260   |

The number of live embryos recovered from each developmental stage are shown.

## Supplemental Table 2

Number of embryos obtained from crosses between ALK5<sup>fl/+</sup>:Tie2-Cre and ALK5<sup>fl/fl</sup> mice

| ALK5:<br>Tie2-Cre: | fl/+<br>- | fl/fl<br>- | fl/+<br>+ | fl/fl<br>+ | Total |
|--------------------|-----------|------------|-----------|------------|-------|
| E 10.5             | 6         | 8          | 6         | 4          | 24    |
| E 11.5             | 18        | 19         | 14        | 23(1)      | 74    |
| E 12.5             | 8         | 12         | 7         | 15(2)      | 42    |
| E 13.5             | 6         | 3          | 3         | 4(4)       | 16    |
| Post Natal         | 20        | 17         | 19        | 0          | 56    |

The numbers of live embryos recovered from each developmental stage are shown. The numbers of embryos that show no heart beating are in parentheses.

## Primer sets for PCR

|         |         |                                  |
|---------|---------|----------------------------------|
| S1PR1   | forward | 5' - TCGTCTTGCAAAAGTGGTGCGG - 3' |
|         | reverse | 5' - TACAGCAAAGCCAGGTCAGCGA - 3' |
| S1PR2   | forward | 5' - TAGACCGAGCACAGCCAACAGT - 3' |
|         | reverse | 5' - ACGATGGCGCAGCACAAAGAT - 3'  |
| S1PR3   | forward | 5' - ACAAGCCTAGCGGGAGAGAAA - 3'  |
|         | reverse | 5' - TGGTTGCCATGGCTTCCTAG - 3'   |
| S1PR4   | forward | 5' - ATACAGTTGGAACAGTTGGG - 3'   |
|         | reverse | 5' - AACTGTGGGTGTGACTCTGG - 3'   |
| S1PR5   | forward | 5' - TCCAATAGCCGCTCTCCT - 3'     |
|         | reverse | 5' - CACCAAGAGCACAGCCAAGT - 3'   |
| CNN1    | forward | 5' - ATGAGCTCCAGCACCTTCAG - 3'   |
|         | reverse | 5' - ACAGGGTCTGCCTTCTGACT - 3'   |
| PDGF-B  | forward | 5' - TTCCTTCCTCTCTGCTGCTA - 3'   |
|         | reverse | 5' - TCGATGAGGTTCCGAGAGAT - 3'   |
| β-actin | forward | 5' - GCTCATAGCTCTTCTCCAGGG - 3'  |
|         | reverse | 5' - TGAACCCTAAGGCCAACCGTG - 3'  |
